# Supplementary material for: Selection of a self-cleaving ribozyme activated in a chemically and thermally denaturing environment
Source: Royal Society of Chemistry journal article supplement (doi:10.1039/d1cc03102c), 2021-01-01
Supplement: d1cc03102c1.pdf [file d1cc03102c1.pdf]

## **Electronic supplementary information**

### **Selection of a self-cleaving ribozyme activated in chemically and thermally denaturing environment**

Lingzi Ma, Zhicheng Huang, and Juewen Liu\*

Department of Chemistry, Waterloo Institute for Nanotechnology, University of Waterloo,  
Waterloo, Ontario, N2L 3G1, Canada

Email: liujw@uwaterloo.ca

## Materials and Methods

**Oligonucleotides and chemicals.** All the oligonucleotide sequences involved in the selection experiment were purchased from Eurofins Genomics LLC (Table S1). Chemical reagents including T7 RNA polymerase, 10X RNAPol reaction buffer, NTPs mixture, ProtoScript® II reverse transcriptase, 5X ProtoScript II buffer, dNTPs mixture, 0.1 M DTT, low range ssRNA ladder, 2X RNA loading dye, and *Taq* DNA polymerase with standard *Tag* buffer were purchased from New England BioLabs. SYBR gold dye (10,000×) was purchased from Thermo Fisher Scientific. The water used in *in vitro* selection experiments was pre-treated with RNAsecure™ reagent (Thermo Fisher Scientific).

***In vitro* selection.** The initial RNA library was *in vitro* transcribed from a double-stranded DNA template using T7 RNA polymerase. To generate the dsDNA template, one cycle of PCR extension (95°C for 2 min, 95°C for 20 s, 59°C for 20 s, and 72°C for 30 s) was performed using single-stranded antisense DNA template (200 pmol) and primer 1 (200 pmol). The dsDNA template contained 103 base pairs as confirmed on a 2% agarose gel (Figure S6A). The extended DNA template was then purified with a PCR clean-up kit (IBI Scientific) and resuspended in water. The *in vitro* transcription was conducted in a 20 µL reaction (~100 pmol dsDNA template, 2 mM NTPs, 5 U/µL T7 RNA polymerase) by incubating at 37°C for 2 h. The transcription product was precipitated by incubating with 5 M ammonium acetate (1× volume) and ethanol (2.5× volumes) at -20 °C for 1 h. After centrifugation (at 4°C, 14000 rpm, >30 min), the supernatant was carefully removed followed by twice washing with 70% ethanol (ice cold). The air-dried pellet was resuspended and purified by 10% denaturing polyacrylamide gel electrophoresis (dPAGE, 400V, 2 h). The gel was stained in 1× SYBR gold dye (ThermoFisher) and then imaged under a Bio-Rad Chemi-Doc MP imaging system. The intact RNA precursors (80-nt) were extracted from the gel and ethanol precipitated. The RNA precipitant was stored at -20 °C until further use.

In each selection, the RNA library was resuspended in 20 µL of selection buffer (50 mM MES, pH 6, 100 mM Na<sup>+</sup>, 2 mM EDTA•2Na<sup>+</sup>) at room temperature for 2 h. After incubation, the reaction was quenched with 1× RNA loading dye (NEB) at 65°C for 10 min. The RNA loading dye (1×) contains 47.5% formamide, 0.01% SDS, 0.01% bromophenol blue, 0.005% xylene cyanol, and 0.5 mM EDTA. The RNA cleavage products (~67 to ~73-nt) were carefully isolated by aligning with ssRNA ladder on 10% dPAGE. The cleavage products were extracted by crush/soaking the gel slices and were ethanol precipitated. Next, the cleaved RNAs (10 µL) were

annealed with primer 3 (100 pmol) by incubating at 65°C for 5 min. After chilling on ice, 0.5 mM dNTPs, 10 mM DTT, and 10 U/ $\mu$ L ProtoScript<sup>®</sup> II reverse transcriptase were added resulting in a total of 20  $\mu$ L. The cDNA synthesis reaction was performed under 42°C for 1 h followed by inactivation at 80°C for 5 min. The primer 3 restores the lost 3'-fragments after the cleavage reaction. The reverse transcribed product was directly monitored using real-time PCR. As optimized in Figure S6B, the volume of cDNA product was kept  $\leq 1/20$  of the PCR reaction volume to eliminate the interference of residues from reverse transcription. In each round, the fractional cycles ( $C_{1/2}$ ) at which reaction fluorescence reaches half of maximal ( $F_{\max}$ ) was used for PCR amplification (95°C for 2 min, 95°C for 20 s, 59°C for 20 s, and 72°C for 30 s). The optimized cycle# and template length were confirmed with 2% agarose gel (as shown in Figure S6C). Two rounds of PCR (primer 1 and 2) were performed to produce sufficient dsDNA template which is purified by isopropanol precipitation. After resuspended in water,  $\sim 200$  pmol dsDNA was used for the next round of selection.

**Sequencing sample preparation.** To prepare the sample for deep sequencing, PCR1 was performed to generate the full-length library. Next, PCR2 was performed to introduce specific index sequences into the library for the Illumina sequencing technology. Instead of primer 1 and 2, the forward primer (S505) and the reverse primer (N702) were used with their sequences listed in Table S1. The PCR product was then purified with 2% agarose gel (120 V, 50 min). A gel/PCR DNA fragment extraction kit (IBI Scientific) was used to extract the DNA library from the gel. Finally, the purified DNA sample was eluted in 20  $\mu$ L of Milli-Q water. The DNA concentration measured with a NanoDrop spectrophotometer was  $\sim 38.1$  ng/ $\mu$ L. The sample was shipped to McMaster University for deep sequencing.

**Characterization of the cleavage activity.** After sequence analysis, single-stranded DNA templates (Table S1) encoded promising sequences were extended by PCR and *in vitro* transcribed into RNA sequences. The 80-nt RNA products were further purified by 10% dPAGE and ethanol precipitated. The purified ribozyme can be resuspended in water for activity assays. For cleavage reactions performed in 50% formamide, 5  $\mu$ L pure formamide ( $\geq 99\%$ ) and 50 mM Tris•HCl buffer (pH 7.5) was added to a total of 10  $\mu$ L reaction volume. Except for the metal dependency assays, a final concentration of 1 mM EDTA•2Na<sup>+</sup> was added in all reactions. After incubation, the self-cleavage reaction of Rn2 was quenched by cooling at -20°C. The reaction products were then visualized and analyzed on 10% dPAGE. Kinetic data were fit with the first-order equation,

$\%P_{cleavage,t} = \%P_{max}(1 - e^{-K_{obs}t})$ , where  $\%P_{max}$  is the maximum cleavage yield at the end of the reaction and  $K_{obs}$  is the cleavage rate constant.

**Table S1.** The oligonucleotide sequences used in the *in vitro* selection experiment.

|                                 |                                                                                                                                                                |
|---------------------------------|----------------------------------------------------------------------------------------------------------------------------------------------------------------|
| Antisense DNA template (103-nt) | 5' <b>GGCCATC</b> TTCTATAGGCTTGTGCCTAN <sub>7</sub> AGTCAACACTN <sub>20</sub> <b>GATGGCC</b> TCTCTTCCC<br><b>TATAGTGAGTCGTATTA</b> <u>GAATTC</u>               |
| Sense DNA template (103-nt)     | 5' GAATTC <b>TAATACGACTCACTATA</b> AGGGAAGAGAG <b>GGCCATC</b> N <sub>20</sub> AGTGTTGACTN <sub>7</sub> <b>TAGG</b><br><b>CACAAGCCTA</b> TAGGAAG <b>GATGGCC</b> |
| Primer 1 (39 nt)                | 5' <u>GAATTC</u> <b>TAATACGACTCACTATA</b> AGGGAAGAGAG <b>GGCCATC</b>                                                                                           |
| Primer 2 (21 nt)                | 5' <b>GGCCATC</b> TTCTATAGGCTTG                                                                                                                                |
| Primer 3 (27 nt)                | 5' <b>GGCCATC</b> TTCTATAGGCTTGTGCCTA                                                                                                                          |
| S505 primer                     | 5' AATGATACGGCGACCACCGAGATCTACAC- <b>GTAAGGAG</b> -<br>ACACTCTTTCCCTACACGACGCTCTTCCGATCT-NNNN-GGGAAGAGAG <b>GGCCATC</b>                                        |
| N702 primer                     | 5' CAAGCAGAAGACGGCATACGAGAT- <b>CTAGTACG</b> -<br>GTGACTGGAGTTCAGACGTGTGCTCTTCCGATCT- <b>GGCCATC</b> TTCTATAGGCTTG                                             |
| Rn2 DNA template                | 5' GGGAAGAGAGGCCATC <b>AGGTC</b> ACTCTCCCGCCCCCAGTGTTGACT <b>ACCCCTT</b> TAGG<br>CACAAGCCTATAGGAAGATGGCC                                                       |
| Rn2.1 DNA template              | 5' GGGAAGAGAGGCCATC <b>AACGGTCTCCGGTCCCACT</b> AGTGTTGACT <b>ACCCCAT</b> TAGG<br>CACAAGCCTATAGGAAGATGGCC                                                       |
| Rn2.2 DNA template              | 5' GGGAAGAGAGGCCATC <b>AGGTCGACTCGTCCCGCCCC</b> AGTGTTGACT <b>ACCCAAA</b> TAGG<br>CACAAGCCTATAGGAAGATGGCC                                                      |

Note: **Red coloured domain** represents the T7 promotor sequence; Underlined domain is to ensure T7 promotor in duplex; Grey coloured domain is for primer binding.

**Table S2.** Top 8 families (from 5' to 3') after sequence alignment present in the final library. The red and blue regions represent the N<sub>20</sub> and N<sub>7</sub> regions, respectively.

2. GGGAAGAGAGGCCATC**AGGTC**ACTCTCCCGCCCCCAGTGTTGACT**ACCCCTT**TAGGCACAAGCCTATAGGAAGATGGCC (98 reads)
5. GGGAAGAGAGGCCATC**CCTCGGTCTCCTAGCTTCCC**AGTGTTGACT**ACTCCCT**TAGGCACAAGCCTATAGGAAGATGGCC (69 reads)
14. GGGAAGAGAGGCCATC**CTATCATGGTCTCCGCTCCC**AGTGTTGACT**CCACACG**TAGGCACAAGCCTATAGGAAGATGGCC (55 reads)
17. GGGAAGAGAGGCCATC**ATGGTCTCCGATCCCATCCC**AGTGTTGACT**CCTGACA**TAGGCACAAGCCTATAGGAAGATGGCC (52 reads)
19. GGGAAGAGAGGCCATC**CCGGTCTCAGTTTCCCAG**AGTGTTGACT**CTCCCTT**TAGGCACAAGCCTATAGGAAGATGGCC (50 reads)
20. GGGAAGAGAGGCCATC**CATCTGGTCTAACTTCCCGA**AGTGTTGACT**CCCCCTC**TAGGCACAAGCCTATAGGAAGATGGCC (50 reads)
23. GGGAAGAGAGGCCATC**CCGGTCTCAGTTTCCCAG**AGTGTTGACT**CTCCCTT**TAGGCACAAGCCTATAGGAAGATGGCC (48 reads)
24. GGGAAGAGAGGCCATC**CGCGCACTCATTCCCAACCC**AGTGTTGACT**CATCCTT**TAGGCACAAGCCTATAGGAAGATGGCC (48 reads)

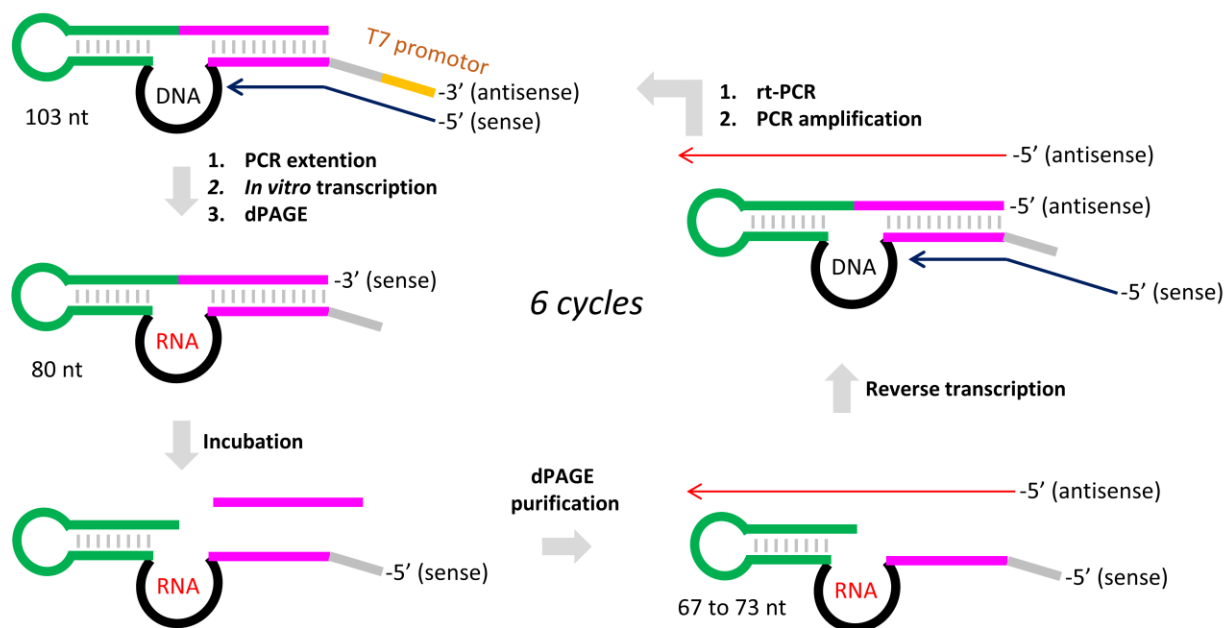

**Scheme S1.** The *in vitro* selection procedure for self-cleaving ribozymes. In each selection round, the RNA library (80-nt) was generated by *in vitro* transcription followed by dPAGE purification. The purified RNAs were incubated in the selection buffer (50 mM MES, pH 6, 100 mM NaCl, 2 mM EDTA•2Na<sup>+</sup>) at room temperature for 2 h. Afterwards, the downstream products with lengths between ~67 to 73-nt were purified by dPAGE and amplified by reverse transcription PCR.

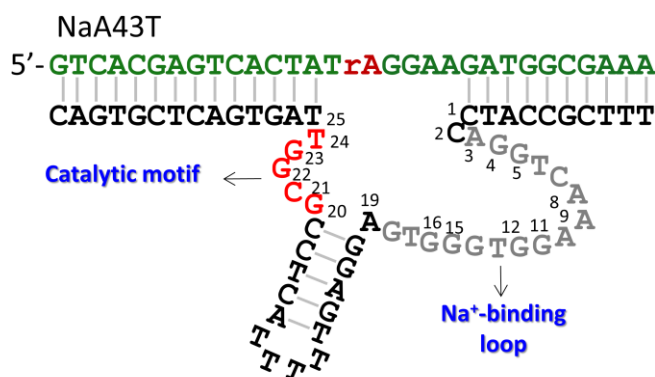

**Figure S1.** The secondary structure of the NaA43T DNazyme.<sup>1,2</sup>

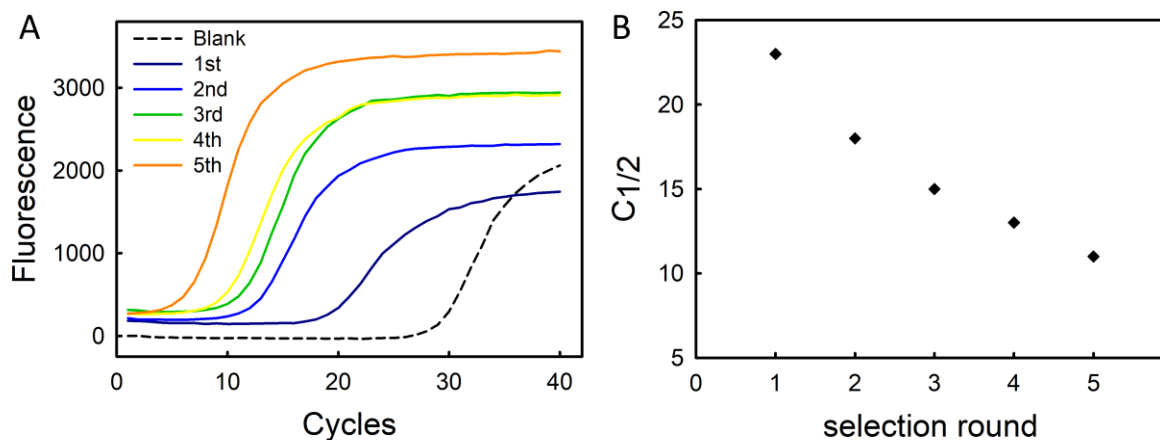

**Figure S2.** (A) Real-time PCR used to monitor the gradual increase in RNA population in the library along with the selection progress. (B) The fractional cycles ( $C_{1/2}$ ) based on the real-time PCR, at which the reaction fluorescence reached half of maximal ( $F_{\max}$ ).

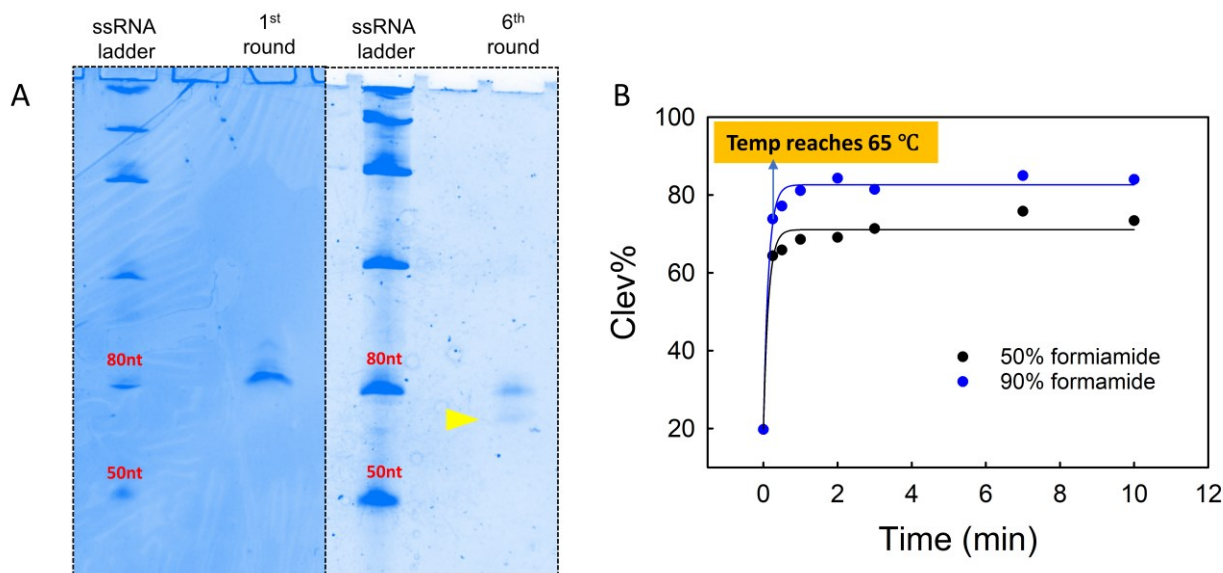

**Figure S3.** (A) Gel images showing the cleavage products of the first and sixth round after the selection step (the product band indicated by the yellow arrowhead). (B) The cleavage% measured at different time points in the presence of 50% and 90% formamide at 65°C.

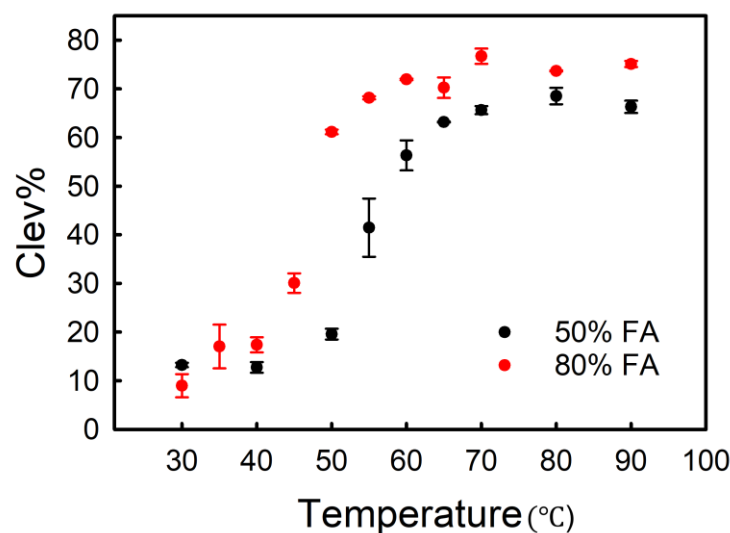

**Figure S4.** The cleavage% of Rn2 measured in 50% or 80% formamide during a slow heating process. The reaction was gradually heated from 30°C to 90°C. The reaction was remained for 20 s at each temperature point. An accumulated cleavage% was measured after being quenched at each temperature point.

#### A. Complete plasmids database

NCBI Multiple Sequence Alignment Viewer, Version 1.20.0

| Sequence ID       | Start   | Alignment                               | End     | Organism                          |
|-------------------|---------|-----------------------------------------|---------|-----------------------------------|
| Query_11475 (+)   | 1       | A G G T C A C T C T C C G C C C C C C C | 20      |                                   |
| NZ_CP053288.1 (-) | 228,396 | - - - - - G - - - - -                   | 228,379 | Thermus thermophilus              |
| NZ_CP031163.1 (-) | 234,704 | - - - - - G - - - - -                   | 234,688 | Deinococcus wulumuensis           |
| NC_017590.1 (-)   | 52,489  | - - - - - G - - - - -                   | 52,472  | Thermus thermophilus JL-18        |
| NC_005838.1 (-)   | 190,846 | - - - - - G - - - - -                   | 190,829 | Thermus thermophilus HB27         |
| NZ_LR027519.1 (+) | 15,750  | - - - - - G - - - - -                   | 15,767  | Thermus thermophilus              |
| NC_017273.1 (+)   | 403,444 | - - - - - G - - - - -                   | 403,461 | Thermus thermophilus SG0.5JP17... |
| NZ_AP024272.1 (-) | 155,297 | - - - - - G - - - - -                   | 155,280 | Thermus thermophilus              |
| NZ_CP041241.1 (+) | 443,659 | - - - - - G - - - - -                   | 443,675 | Ensifer mexicanus                 |
| NZ_CP020572.1 (-) | 46,027  | - - - - - G - - - - -                   | 46,010  | Thermus aquaticus                 |
| NZ_CM007204.1 (-) | 63,239  | - - - - - C - - - - -                   | 63,222  | Streptomyces subtilis             |
| NZ_CP032054.1 (+) | 94,623  | - - - - - A - - - - -                   | 94,639  | Streptomyces clavuligerus         |
| NZ_CP030263.1 (-) | 62,235  | - - - - - - - - - - -                   | 62,219  | Ensifer adhaerens                 |
| NZ_CP015881.1 (+) | 365,221 | - - - - - - - - - - -                   | 365,237 | Ensifer adhaerens                 |

#### B. Complete genomes database

NCBI Multiple Sequence Alignment Viewer, Version 1.20.0

| Sequence ID       | Start    | Alignment                               | End      | Organism                   |
|-------------------|----------|-----------------------------------------|----------|----------------------------|
| Query_24537 (+)   | 1        | A G G T C A C T C T C C G C C C C C C C | 20       |                            |
| NZ_CP011273.1 (+) | 4,501... | - - - - - C - - - - -                   | 4,501... | Planctomycetes sp. SH-PL62 |
| NZ_CP044543.1 (-) | 5,745... | - - - - - C - - - - -                   | 5,745... | Bradyrhizobium betae       |
| NZ_CP027231.1 (+) | 1,292... | - - - - - C - - - - -                   | 1,292... | Bacteroides zoogloformans  |
| NZ_CP043959.1 (+) | 1,732... | - - - - - C - - - - -                   | 1,732... | Streptomyces tendae        |
| NZ_CP032402.1 (-) | 219,217  | - - - - - C - - - - -                   | 219,201  | Thermomonospora amylo...   |
| NZ_CP009754.1 (+) | 802,726  | - - - - - C - - - - -                   | 802,742  | Streptomyces sp. CCM...    |
| NZ_CP029788.1 (-) | 1,409... | - - - - - A - - - - -                   | 1,409... | Streptomyces actuosus      |
| NZ_CP050120.1 (-) | 2,248... | - - - - - G - - - - -                   | 2,248... | Deinococcus radiodurans    |
| NZ_CP015219.1 (-) | 3,089... | - - - - - - - - - - -                   | 3,089... | Rhodococcus sp. PBTS 1     |
| CP042594.1 (+)    | 5,376... | - - - - - - - - - - -                   | 5,376... | Streptomyces albobriscus   |
| NZ_CP030263.1 (-) | 62,235   | - - - - - - - - - - -                   | 62,219   | Ensifer adhaerens          |

**Figure S5.** Nucleotide NCBI-BLAST results showing the alignments of Rn2 motif in complete plasmids (A) or genomes (B) databases of microbes. The N<sub>20</sub> region of Rn2 ribozyme was used as the input sequence.<sup>3</sup>

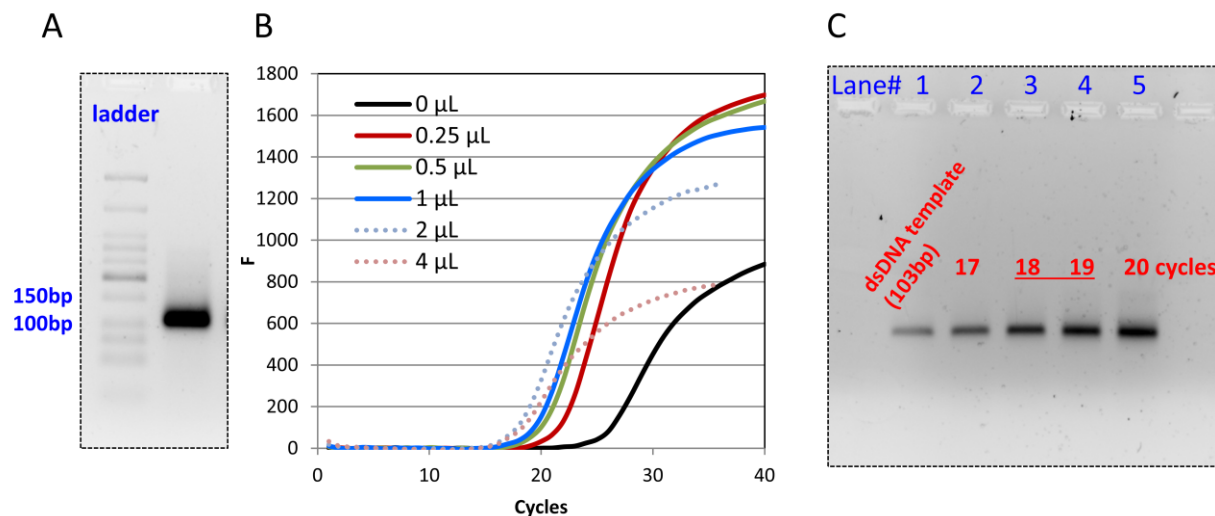

**Figure S6.** (A) A gel micrograph showing the extended dsDNA template use for *in vitro* transcription with a length of 103 bps. (B) Real-time PCR for optimizing the cDNA volume used in PCR reaction. The volume of the cDNA was kept  $\leq 1/20$  of the PCR reaction volume to eliminate the interference of residues from the reverse transcription reaction. (C) The optimized PCR cycle number and template length were confirmed with 2% agarose gel for each round of selection.

Raw gel image for Figure 2C:

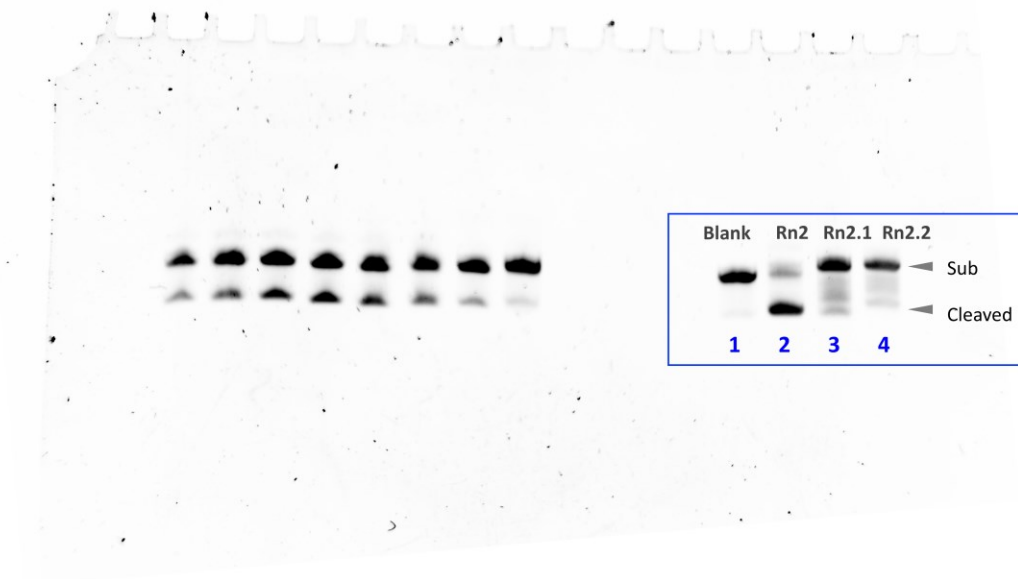

Raw gel image for Figure 3A:

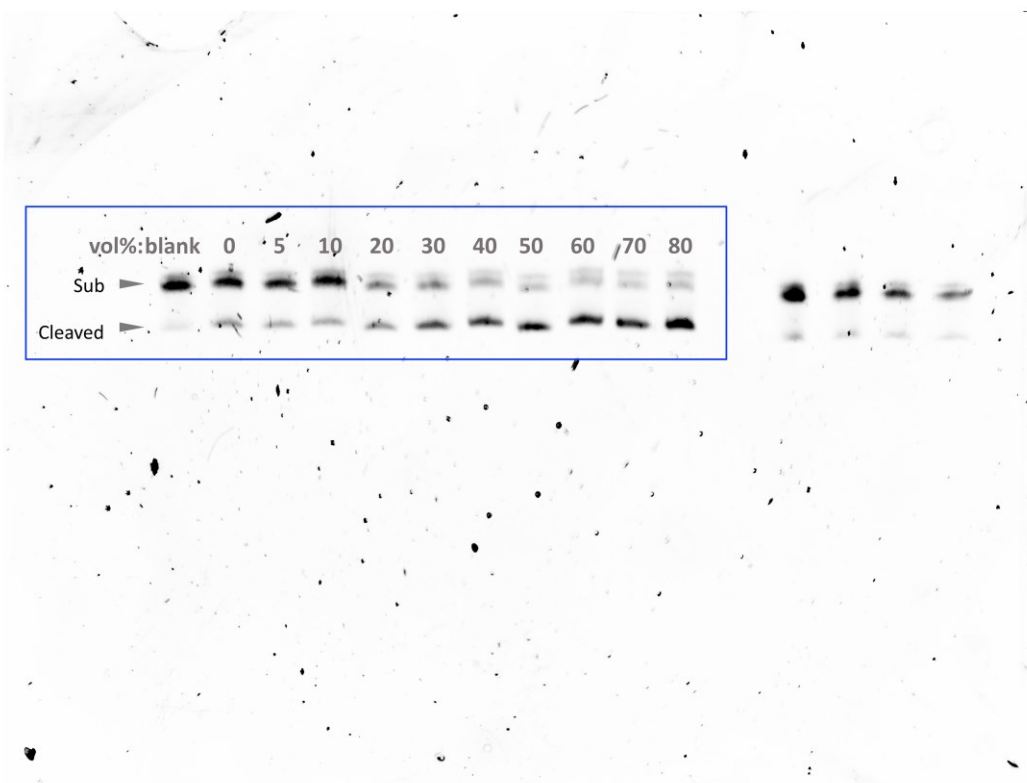

Raw gel image for Figure 3B:

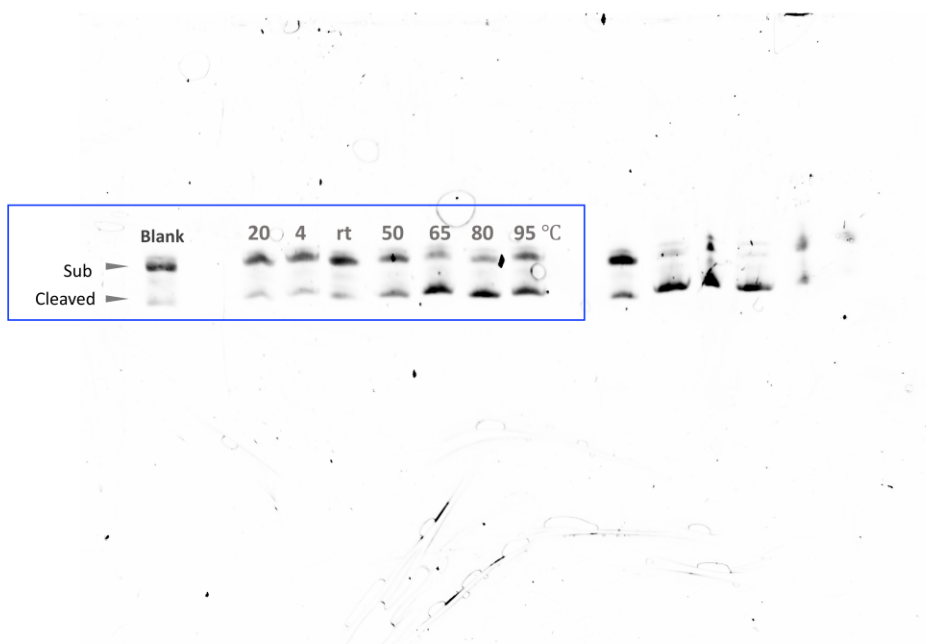

Raw gel image for Figure 3C:

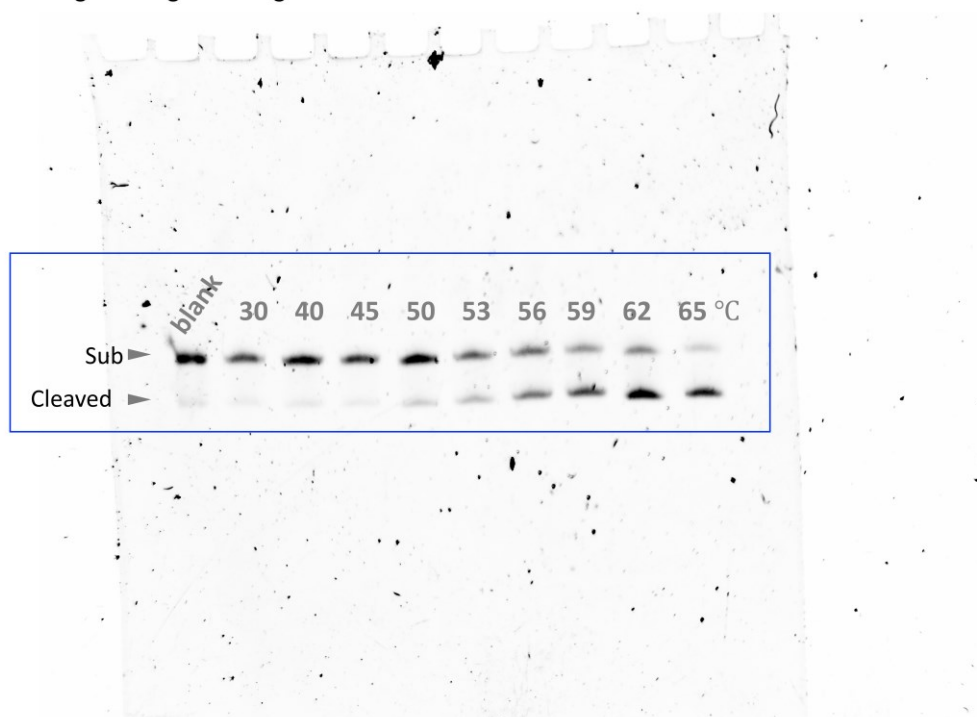

## References

1. S.-F. Torabi, P. Wu, C. E. McGhee, L. Chen, K. Hwang, N. Zheng, J. Cheng and Y. Lu, *Proc. Natl. Acad. Sci. U.S.A.*, 2015, **112**, 5903-5908.
2. W. Zhou, Y. Zhang, P.-J. J. Huang, J. Ding and J. Liu, *Nucleic Acids Res.*, 2016, **44**, 354-363.
3. S. F. Altschul, T. L. Madden, A. A. Schäffer, J. Zhang, Z. Zhang, W. Miller and D. J. Lipman, *Nucleic Acids Res.*, 1997, **25**, 3389-3402.
